# Supplementary material for: Prediction of resistance to chemotherapy in ovarian cancer: a systematic review
Source: Springer Nature journal article supplement (doi:10.1186/s12885-015-1101-8), 2015-03-10
Supplement: MOESM3 [file 9743992]

QUADAS-2 [18] results and CEBM 2011 Levels of Evidence [19]

| Study                               | RISK OF BIAS      |            |                    |                 | APPLICABILITY CONCERNS |            |                    | Level of Evidence |
|-------------------------------------|-------------------|------------|--------------------|-----------------|------------------------|------------|--------------------|-------------------|
|                                     | PATIENT SELECTION | INDEX TEST | REFERENCE STANDARD | FLOW AND TIMING | PATIENT SELECTION      | INDEX TEST | REFERENCE STANDARD |                   |
| Jeong <i>et. al.</i> [27]           | 😊                 | 😊          | 😊                  | 😊               | 😊                      | 😊          | 😊                  | 2                 |
| Lisowska <i>et. al.</i> [44]        | 😊                 | 😊          | 😊                  | 😊               | 😊                      | 😊          | 😊                  | 2                 |
| Roque <i>et. al.</i> [39]           | 😊                 | ?          | 😊                  | 😊               | 😊                      | 😊          | 😊                  | 2                 |
| Li <i>et. al.</i> [3]               | 😊                 | 😊          | 😊                  | 😊               | 😊                      | 😊          | 😊                  | 2                 |
| Schwede <i>et. al.</i> [47]         | 😊                 | 😊          | 😊                  | 😊               | 😊                      | 😊          | 😊                  | 2                 |
| Verhaak <i>et. al.</i> [48]         | 😊                 | 😊          | 😊                  | 😊               | 😊                      | 😊          | 😊                  | 2                 |
| Obermayr <i>et. al.</i> [32]        | 😊                 | 😊          | 😊                  | 😊               | 😊                      | 😞          | 😊                  | 2                 |
| Han <i>et. al.</i> [49]             | 😊                 | 😊          | 😊                  | 😊               | 😊                      | 😊          | 😊                  | 2                 |
| Hsu <i>et. al.</i> [50]             | 😊                 | 😊          | 😊                  | 😊               | 😊                      | 😊          | 😊                  | 2                 |
| Lui <i>et. al.</i> [51]             | 😊                 | 😊          | 😊                  | 😊               | 😊                      | 😊          | 😊                  | 2                 |
| Kang <i>et. al.</i> [42]            | 😊                 | 😊          | 😊                  | 😊               | 😊                      | 😊          | 😊                  | 2                 |
| Gillet <i>et. al.</i> [52]          | 😊                 | 😊          | 😊                  | 😊               | 😊                      | 😊          | 😊                  | 2                 |
| Ferriss <i>et. al.</i> [28]         | 😊                 | 😊          | 😊                  | 😊               | 😊                      | 😊          | 😊                  | 2                 |
| Brun <i>et. al.</i> [45]            | 😊                 | 😊          | 😊                  | 😊               | 😊                      | 😊          | 😊                  | 2                 |
| Skirnisdottir and Seidal [38]       | 😊                 | ?          | 😊                  | 😊               | 😊                      | 😊          | 😊                  | 2                 |
| Brenne <i>et. al.</i> [53]          | 😊                 | 😊          | 😊                  | 😊               | 😊                      | 😊          | 😊                  | 2                 |
| Sabatier <i>et. al.</i> [54]        | 😊                 | 😊          | 😊                  | 😊               | 😊                      | 😊          | 😊                  | 2                 |
| Gillet <i>et. al.</i> [24]          | 😊                 | 😊          | 😊                  | 😊               | 😊                      | 😊          | 😊                  | 2                 |
| Chao <i>et. al.</i> [55]            | 😞                 | 😊          | 😞                  | 😊               | 😊                      | 😊          | 😞                  | 3                 |
| Schlumbrecht <i>et. al.</i> [40]    | 😊                 | 😊          | 😊                  | 😊               | 😊                      | 😊          | 😊                  | 2                 |
| Glaysheer <i>et. al.</i> [20]       | 😊                 | 😊          | 😊                  | 😊               | 😊                      | 😊          | 😊                  | 2                 |
| Yan <i>et. al.</i> [56]             | 😊                 | 😊          | 😊                  | 😊               | 😊                      | 😊          | 😊                  | 2                 |
| Yoshihara <i>et. al.</i> [22]       | 😊                 | 😊          | 😊                  | 😊               | 😊                      | 😊          | 😊                  | 2                 |
| Williams <i>et. al.</i> [29]        | 😊                 | 😊          | 😊                  | 😊               | 😊                      | 😊          | 😊                  | 2                 |
| Denkert <i>et. al.</i> [41]         | 😊                 | 😊          | 😊                  | 😊               | 😊                      | 😊          | 😊                  | 2                 |
| Matsumara <i>et. al.</i> [30]       | 😊                 | 😊          | 😊                  | 😊               | 😊                      | 😊          | 😊                  | 2                 |
| Crijns <i>et. al.</i> [23]          | 😊                 | 😊          | 😊                  | 😊               | 😊                      | 😊          | 😊                  | 2                 |
| Mendiola <i>et. al.</i> [57]        | ?                 | ?          | 😊                  | 😊               | 😊                      | 😊          | 😊                  | 2                 |
| Gevaert <i>et. al.</i> [34]         | ?                 | 😊          | 😊                  | 😊               | 😊                      | 😊          | 😊                  | 2                 |
| Bachvarov <i>et. al.</i> [58]       | 😞                 | 😊          | 😊                  | 😊               | 😊                      | 😊          | 😊                  | 3                 |
| Netinatsunthorn <i>et. al.</i> [59] | 😊                 | 😊          | 😊                  | 😊               | 😊                      | 😊          | 😊                  | 2                 |
| De Smet <i>et. al.</i> [60]         | 😞                 | 😊          | 😊                  | 😊               | 😊                      | 😊          | 😊                  | 3                 |
| Helleman <i>et. al.</i> [33]        | 😊                 | 😊          | 😊                  | 😊               | 😊                      | 😊          | 😊                  | 2                 |
| Spentzos <i>et. al.</i> [61]        | 😊                 | 😊          | 😊                  | 😞               | 😊                      | 😊          | 😊                  | 2                 |
| Jazaeri <i>et. al.</i> [62]         | 😞                 | 😊          | 😊                  | 😊               | 😊                      | 😊          | 😊                  | 3                 |
| Raspollini <i>et. al.</i> [37]      | ?                 | 😊          | 😊                  | 😊               | 😊                      | 😊          | 😊                  | 3                 |
| Hartmann <i>et. al.</i> [21]        | 😊                 | 😊          | 😊                  | 😊               | 😊                      | 😊          | 😊                  | 2                 |
| Spentzos <i>et. al.</i> [36]        | 😊                 | 😊          | 😊                  | 😊               | 😊                      | 😊          | 😊                  | 2                 |
| Selvanayagam <i>et. al.</i> [35]    | ?                 | 😊          | 😊                  | 😊               | 😊                      | 😊          | 😊                  | 3                 |
| Iba <i>et. al.</i> [63]             | 😊                 | 😊          | 😊                  | 😊               | 😊                      | 😊          | 😊                  | 2                 |
| Kamazawa <i>et. al.</i> [31]        | 😊                 | 😞          | 😊                  | 😊               | 😊                      | 😊          | 😊                  | 2                 |
| Vogt <i>et. al.</i> [26]            | 😊                 | 😊          | 😊                  | 😊               | 😊                      | 😊          | 😊                  | 2                 |

😊 Low Risk    😞 High Risk    ? Unclear Risk
